# Supplementary material for: Draft genome sequences of ‘Candidatus Chloroploca asiatica’ and ‘Candidatus Viridilinea mediisalina’, candidate representatives of the Chloroflexales order: phylogenetic and taxonomic implications
Source: PubMed Central journal article supplement (PMC6180586; doi:10.1186/s40793-018-0329-8), 2018-10-11
Supplement: 40793_2018_329_MOESM1_ESM.pdf [file 40793_2018_329_MOESM1_ESM.pdf]

## Supplementary figures

**Draft genome sequences of ‘*Candidatus Chloroploca asiatica*’ and ‘*Candidatus Viridilinea mediisalina*’, as representatives of the *Chloroflexales* order: Phylogenetic and taxonomic implications.**

Denis S Grouzdev, Maria S. Rysina, Irina A Bryantseva, Vladimir M Gorlenko and Vasil A. Gaisin\*

\* Correspondence: [vasil.beingi@gmail.com](mailto:vasil.beingi@gmail.com)

|          |                                         | 170                                         | 180                             | 190           | 200                | 210                             |
|----------|-----------------------------------------|---------------------------------------------|---------------------------------|---------------|--------------------|---------------------------------|
| <b>a</b> | Chloroflexinae<br>(9/10)                | <i>Chloroflexus aurantiacus</i>             | YF_001635711                    | -GLKVG        | EQIFLAFSPERIDPGQTS | SKGYSVENTPKVVGVT                |
|          |                                         | <i>Chloroflexus aggregans</i>               | WP_015940314                    | .....R.....   | .....F.....        | .....P.....                     |
|          |                                         | <i>Chloroflexus islandicus</i>              | WP_066791173                    | .....R.....   | .....D.....        | .....S.....                     |
|          |                                         | <i>Chloroflexus</i> sp. Y-396-1             | WP_044231908                    | .....R.....   | .....D.....        | .....S.....                     |
|          |                                         | <i>Chloroflexus</i> sp. MS-G                | WP_031458479                    | .....R.....   | .....D.....        | .....S.....                     |
|          |                                         | <i>Chloroflexus</i> sp. Y-400-fl            | ACM53671                        | .....R.....   | .....D.....        | .....S.....                     |
|          |                                         | 'Ca. Chloranaerofilum corporosum'           | peg.1520                        | .....Q.....   | .....QDY.....      | .....G.....                     |
|          |                                         | <i>Oscillochloris trichoides</i>            | WP_006562849                    | .....T.....   | .....QE.....       | .....WG.....                    |
|          |                                         | 'Ca. Viridilinea mediisalina'               | WP_097643348                    | .....V.....   | .....HDY.....      | .....Q.....                     |
|          |                                         | 'Ca. Chloroploca asiatica'                  | WP_097651378                    | D.....R.....  | .....DF.....       | .....C.....                     |
|          | Roseiflexinae (0/2)                     | <i>Roseiflexus castenholzii</i>             | WP_012121561                    | .....T.....   | .....TDY.....      | .....V.....                     |
|          |                                         | <i>Roseiflexus</i> sp. RS-1                 | WP_011957117                    | .....T.....   | .....VDY.....      | .....V.....                     |
|          |                                         | <i>Kallotenuales</i> (1/1)                  | <i>Kallotenua papyrolyticum</i> | WP_026370457  | .....Q.....        | .....RDFW.....                  |
|          |                                         | <i>Herpetosiphon geysericola</i>            | WP_054536503                    | .....N.....   | .....T.....        | .....DY.....                    |
|          |                                         | <i>Herpetosiphon aurantiacus</i>            | ABX06463                        | .....N.....   | .....S.....        | .....ADY.....                   |
|          | Other Bacteria<br>(0/250)               | <i>Desulfotobacterium hafniense</i>         | WP_011461043                    | .....N.....   | .....KDF.....      | .....V.....                     |
|          |                                         | <i>Caldicellulosiruptor saccharolyticus</i> | WP_011917322                    | .....V.....   | .....CQDF.....     | .....V.....                     |
|          |                                         | <i>Sulfobacillus thermosulfidooxidans</i>   | WP_026040704                    | .....I.....   | .....EF.....       | .....VN.....                    |
|          |                                         | <i>Anaerospirillum subterranea</i>          | WP_066241847                    | .....KDF..... | .....V.....        | .....NQR.....                   |
|          |                                         | <i>Pelosinus propionicus</i>                | WP_090940131                    | .....QDF..... | .....V.....        | .....NLR.....                   |
|          |                                         | <i>Ethanoligenens harbinense</i>            | WP_013484606                    | .....R.....   | .....VD.....       | .....V.....                     |
|          |                                         | <i>Thermoanaerobacter kivui</i>             | WP_049684727                    | .....I.....   | .....C.....        | .....DY.....                    |
|          |                                         | <i>Calderihabitans maritimus</i>            | WP_088555115                    | .....KDF..... | .....Y.....        | .....V.....                     |
|          |                                         | <i>Thermoactinomyces daqus</i>              | WP_033100375                    | .....E.....   | .....F.....        | .....Y.....                     |
|          |                                         | <i>Bacillus sinesaloumensis</i>             | WP_077619738                    | .....V.....   | .....V.....        | .....V.....                     |
| <b>b</b> | Chloroflexaceae<br>(6/6)                | <i>Chloroflexus aurantiacus</i>             | ABY35796                        | LSPRFYTTDFK   | AIDRLRIDR          | NGLRDEFDWIRDEFAYDYNRTHFRRTDEF-L |
|          |                                         | <i>Chloroflexus aggregans</i>               | WP_012616557                    | .....K.....   | .....Q.....        | .....N.....                     |
|          |                                         | <i>Chloroflexus islandicus</i>              | WP_066789121                    | .....N.....   | .....Q.....        | .....N.....                     |
|          |                                         | <i>Chloroflexus</i> sp. MS-G                | WP_035419164                    | .....K.....   | .....Q.....        | .....N.....                     |
|          |                                         | <i>Chloroflexus</i> sp. Y-400-fl            | ACM54187                        | .....K.....   | .....Q.....        | .....N.....                     |
|          |                                         | <i>Chloroflexus</i> sp. Y-396-1             | WP_028459760                    | .....K.....   | .....Q.....        | .....N.....                     |
|          | Viridilinea + Chloranaerofilum<br>(2/2) | 'Ca. Viridilinea mediisalina'               | WP_097644194                    | .....T.....   | .....VA.....       | .....AFD.....                   |
|          |                                         | 'Ca. Chloranaerofilum corporosum'           | peg.1770                        | .....T.....   | .....A.....        | .....D.....                     |
|          | Roseiflexaceae<br>(0/2)                 | 'Ca. Chloranaerofilum corporosum'           | peg.1135                        | .....T.....   | .....A.....        | .....D.....                     |
|          |                                         | <i>Roseiflexus castenholzii</i>             | WP_012120062                    | .....N.....   | .....R.....        | .....NVAH.....                  |
|          |                                         | <i>Roseiflexus</i> sp. RS-1                 | WP_011956640                    | .....N.....   | .....R.....        | .....NVAH.....                  |
|          |                                         | <i>Rhodospirillum centenum</i>              | WP_041785293                    | .....Y.....   | .....R.....        | .....L.....                     |
|          |                                         | <i>Acidisphaera rubrifaciens</i>            | WP_048860643                    | .....T.....   | .....D.....        | .....M.....                     |
|          | Other Bacteria<br>(0/250)               | <i>Caenispirillum salinarum</i>             | WP_009538677                    | .....T.....   | .....D.....        | .....M.....                     |
|          |                                         | <i>Sphingomonas echinoides</i>              | WP_010405227                    | .....T.....   | .....A.....        | .....M.....                     |
|          |                                         | <i>Bradyrhizobium oligotrophicum</i>        | WP_015668952                    | .....T.....   | .....A.....        | .....M.....                     |
|          |                                         | <i>Brevundimonas bacteroides</i>            | WP_035293742                    | .....A.....   | .....L.....        | .....IDVTP.....                 |
|          |                                         | <i>Methylocella silvestris</i>              | WP_012591042                    | .....A.....   | .....L.....        | .....IDVTP.....                 |
|          |                                         | <i>Skermanella aerolata</i>                 | WP_044427866                    | .....Y.....   | .....D.....        | .....L.....                     |
|          |                                         | <i>Polynucleobacter duraquae</i>            | WP_046331234                    | .....D.....   | .....EM.....       | .....FD.....                    |
|          |                                         | <i>Novosphingobium acidiphilum</i>          | WP_028640497                    | .....V.....   | .....K.....        | .....W.....                     |
|          |                                         | <i>Skermanella stibiiresistens</i>          | WP_037453867                    | .....V.....   | .....R.....        | .....W.....                     |
|          |                                         | <i>Sphingomonas spermidinifaciens</i>       | WP_096342039                    | .....V.....   | .....R.....        | .....W.....                     |
|          | <i>Rhodopseudomonas palustris</i>       | WP_085978276                                | .....T.....                     | .....Y.....   | .....M.....        |                                 |
|          | <i>Porphyrobacter tepidarius</i>        | WP_086616646                                | .....D.....                     | .....L.....   | .....KIDVGP.....   |                                 |

Figure 1S. Previously reported CSIs: nucleotide sugar dehydrogenase (a) and magnesium-protoporphyrin IX monomethyl ester cyclase (AcsF) proteins (b).

|                                                                                                                                                                                                                                                                                                                                                                                                                                                                                                                                                                                                                                                                                                                                                                                                                                                                                                                                                                                                                                                                                                                                                                                                                                                                                                                                                                                                                                                 |                                                                                 | 50                                                                                                                                                                                                                                                                                                                                                                                                                                                                                                                                                                                                                                                                                                                                                                                                                                                                                                                                                                                                                                                                                                                                                                                                                                                                                                                                                                                                                                                                              | 60                            | 70                                                                              | 80            | 90 |  |
|-------------------------------------------------------------------------------------------------------------------------------------------------------------------------------------------------------------------------------------------------------------------------------------------------------------------------------------------------------------------------------------------------------------------------------------------------------------------------------------------------------------------------------------------------------------------------------------------------------------------------------------------------------------------------------------------------------------------------------------------------------------------------------------------------------------------------------------------------------------------------------------------------------------------------------------------------------------------------------------------------------------------------------------------------------------------------------------------------------------------------------------------------------------------------------------------------------------------------------------------------------------------------------------------------------------------------------------------------------------------------------------------------------------------------------------------------|---------------------------------------------------------------------------------|---------------------------------------------------------------------------------------------------------------------------------------------------------------------------------------------------------------------------------------------------------------------------------------------------------------------------------------------------------------------------------------------------------------------------------------------------------------------------------------------------------------------------------------------------------------------------------------------------------------------------------------------------------------------------------------------------------------------------------------------------------------------------------------------------------------------------------------------------------------------------------------------------------------------------------------------------------------------------------------------------------------------------------------------------------------------------------------------------------------------------------------------------------------------------------------------------------------------------------------------------------------------------------------------------------------------------------------------------------------------------------------------------------------------------------------------------------------------------------|-------------------------------|---------------------------------------------------------------------------------|---------------|----|--|
| <b>a</b>                                                                                                                                                                                                                                                                                                                                                                                                                                                                                                                                                                                                                                                                                                                                                                                                                                                                                                                                                                                                                                                                                                                                                                                                                                                                                                                                                                                                                                        | Viridilinea + Chloroploca + Chloranaerofilum (3/3)<br>Oscillochloridaceae (0/1) | 'Ca. Chloroploca asiatica'                                                                                                                                                                                                                                                                                                                                                                                                                                                                                                                                                                                                                                                                                                                                                                                                                                                                                                                                                                                                                                                                                                                                                                                                                                                                                                                                                                                                                                                      | WP_097651169                  | TDDTRIRAALPTIRYLLLEQGAN                                                         |               |    |  |
|                                                                                                                                                                                                                                                                                                                                                                                                                                                                                                                                                                                                                                                                                                                                                                                                                                                                                                                                                                                                                                                                                                                                                                                                                                                                                                                                                                                                                                                 |                                                                                 | 'Ca. Viridilinea mediisalina'                                                                                                                                                                                                                                                                                                                                                                                                                                                                                                                                                                                                                                                                                                                                                                                                                                                                                                                                                                                                                                                                                                                                                                                                                                                                                                                                                                                                                                                   | WP_097644065                  | .....H.....                                                                     |               |    |  |
|                                                                                                                                                                                                                                                                                                                                                                                                                                                                                                                                                                                                                                                                                                                                                                                                                                                                                                                                                                                                                                                                                                                                                                                                                                                                                                                                                                                                                                                 |                                                                                 | 'Ca. Chloranaerofilum corporosum'                                                                                                                                                                                                                                                                                                                                                                                                                                                                                                                                                                                                                                                                                                                                                                                                                                                                                                                                                                                                                                                                                                                                                                                                                                                                                                                                                                                                                                               | peg.3082                      | .....H.....                                                                     |               |    |  |
|                                                                                                                                                                                                                                                                                                                                                                                                                                                                                                                                                                                                                                                                                                                                                                                                                                                                                                                                                                                                                                                                                                                                                                                                                                                                                                                                                                                                                                                 | Chloroflexaceae (0/6)                                                           | Oscillochloris trichoides                                                                                                                                                                                                                                                                                                                                                                                                                                                                                                                                                                                                                                                                                                                                                                                                                                                                                                                                                                                                                                                                                                                                                                                                                                                                                                                                                                                                                                                       | WP_044200294                  | .....E.S.....                                                                   |               |    |  |
|                                                                                                                                                                                                                                                                                                                                                                                                                                                                                                                                                                                                                                                                                                                                                                                                                                                                                                                                                                                                                                                                                                                                                                                                                                                                                                                                                                                                                                                 |                                                                                 | Chloroflexus aurantiacus                                                                                                                                                                                                                                                                                                                                                                                                                                                                                                                                                                                                                                                                                                                                                                                                                                                                                                                                                                                                                                                                                                                                                                                                                                                                                                                                                                                                                                                        | YP_001636411                  | .....H.S.....                                                                   |               |    |  |
|                                                                                                                                                                                                                                                                                                                                                                                                                                                                                                                                                                                                                                                                                                                                                                                                                                                                                                                                                                                                                                                                                                                                                                                                                                                                                                                                                                                                                                                 |                                                                                 | Chloroflexus aggregans                                                                                                                                                                                                                                                                                                                                                                                                                                                                                                                                                                                                                                                                                                                                                                                                                                                                                                                                                                                                                                                                                                                                                                                                                                                                                                                                                                                                                                                          | WP_012615945                  | .....H.K.I.....                                                                 |               |    |  |
|                                                                                                                                                                                                                                                                                                                                                                                                                                                                                                                                                                                                                                                                                                                                                                                                                                                                                                                                                                                                                                                                                                                                                                                                                                                                                                                                                                                                                                                 |                                                                                 | Chloroflexus islandicus                                                                                                                                                                                                                                                                                                                                                                                                                                                                                                                                                                                                                                                                                                                                                                                                                                                                                                                                                                                                                                                                                                                                                                                                                                                                                                                                                                                                                                                         | WP_066789588                  | .....H.S.....                                                                   |               |    |  |
|                                                                                                                                                                                                                                                                                                                                                                                                                                                                                                                                                                                                                                                                                                                                                                                                                                                                                                                                                                                                                                                                                                                                                                                                                                                                                                                                                                                                                                                 |                                                                                 | Chloroflexus sp. Y-396-1                                                                                                                                                                                                                                                                                                                                                                                                                                                                                                                                                                                                                                                                                                                                                                                                                                                                                                                                                                                                                                                                                                                                                                                                                                                                                                                                                                                                                                                        | WP_028459142                  | .....H.S.....                                                                   |               |    |  |
|                                                                                                                                                                                                                                                                                                                                                                                                                                                                                                                                                                                                                                                                                                                                                                                                                                                                                                                                                                                                                                                                                                                                                                                                                                                                                                                                                                                                                                                 |                                                                                 | Chloroflexus sp. Y-400-fl                                                                                                                                                                                                                                                                                                                                                                                                                                                                                                                                                                                                                                                                                                                                                                                                                                                                                                                                                                                                                                                                                                                                                                                                                                                                                                                                                                                                                                                       | ACM54434                      | .....H.S.....                                                                   |               |    |  |
|                                                                                                                                                                                                                                                                                                                                                                                                                                                                                                                                                                                                                                                                                                                                                                                                                                                                                                                                                                                                                                                                                                                                                                                                                                                                                                                                                                                                                                                 | Roseiflexaceae (0/2)                                                            | Chloroflexus sp. MS-G                                                                                                                                                                                                                                                                                                                                                                                                                                                                                                                                                                                                                                                                                                                                                                                                                                                                                                                                                                                                                                                                                                                                                                                                                                                                                                                                                                                                                                                           | WP_031458457                  | .....H.S.....                                                                   |               |    |  |
|                                                                                                                                                                                                                                                                                                                                                                                                                                                                                                                                                                                                                                                                                                                                                                                                                                                                                                                                                                                                                                                                                                                                                                                                                                                                                                                                                                                                                                                 |                                                                                 | Roseiflexus castenholzii                                                                                                                                                                                                                                                                                                                                                                                                                                                                                                                                                                                                                                                                                                                                                                                                                                                                                                                                                                                                                                                                                                                                                                                                                                                                                                                                                                                                                                                        | WP_012120580                  | .....H.A.I.....                                                                 |               |    |  |
|                                                                                                                                                                                                                                                                                                                                                                                                                                                                                                                                                                                                                                                                                                                                                                                                                                                                                                                                                                                                                                                                                                                                                                                                                                                                                                                                                                                                                                                 |                                                                                 | Roseiflexus sp. RS-1                                                                                                                                                                                                                                                                                                                                                                                                                                                                                                                                                                                                                                                                                                                                                                                                                                                                                                                                                                                                                                                                                                                                                                                                                                                                                                                                                                                                                                                            | WP_011956220                  | .....H.S.I.....                                                                 |               |    |  |
|                                                                                                                                                                                                                                                                                                                                                                                                                                                                                                                                                                                                                                                                                                                                                                                                                                                                                                                                                                                                                                                                                                                                                                                                                                                                                                                                                                                                                                                 |                                                                                 | Herpetosiphon geysericola                                                                                                                                                                                                                                                                                                                                                                                                                                                                                                                                                                                                                                                                                                                                                                                                                                                                                                                                                                                                                                                                                                                                                                                                                                                                                                                                                                                                                                                       | WP_054536436                  | .....N.....S.....                                                               |               |    |  |
|                                                                                                                                                                                                                                                                                                                                                                                                                                                                                                                                                                                                                                                                                                                                                                                                                                                                                                                                                                                                                                                                                                                                                                                                                                                                                                                                                                                                                                                 |                                                                                 | Alicyclobacillus kakegawensis                                                                                                                                                                                                                                                                                                                                                                                                                                                                                                                                                                                                                                                                                                                                                                                                                                                                                                                                                                                                                                                                                                                                                                                                                                                                                                                                                                                                                                                   | WP_067932529                  | A.....E.....G.....                                                              |               |    |  |
|                                                                                                                                                                                                                                                                                                                                                                                                                                                                                                                                                                                                                                                                                                                                                                                                                                                                                                                                                                                                                                                                                                                                                                                                                                                                                                                                                                                                                                                 | Other Bacteria (0/250)                                                          | Caldilinea aerophila                                                                                                                                                                                                                                                                                                                                                                                                                                                                                                                                                                                                                                                                                                                                                                                                                                                                                                                                                                                                                                                                                                                                                                                                                                                                                                                                                                                                                                                            | WP_014431650                  | .....A.....Q.....R.....K.....                                                   |               |    |  |
|                                                                                                                                                                                                                                                                                                                                                                                                                                                                                                                                                                                                                                                                                                                                                                                                                                                                                                                                                                                                                                                                                                                                                                                                                                                                                                                                                                                                                                                 |                                                                                 | Carboxydotherrnus ferrereducens                                                                                                                                                                                                                                                                                                                                                                                                                                                                                                                                                                                                                                                                                                                                                                                                                                                                                                                                                                                                                                                                                                                                                                                                                                                                                                                                                                                                                                                 | WP_028051679                  | .....A.....Q.....D.....A.....I.....                                             |               |    |  |
|                                                                                                                                                                                                                                                                                                                                                                                                                                                                                                                                                                                                                                                                                                                                                                                                                                                                                                                                                                                                                                                                                                                                                                                                                                                                                                                                                                                                                                                 |                                                                                 | Thermanaerotherix daxensis                                                                                                                                                                                                                                                                                                                                                                                                                                                                                                                                                                                                                                                                                                                                                                                                                                                                                                                                                                                                                                                                                                                                                                                                                                                                                                                                                                                                                                                      | WP_054522368                  | .....A.....LQ.....R.....K.....LIVA.....                                         |               |    |  |
|                                                                                                                                                                                                                                                                                                                                                                                                                                                                                                                                                                                                                                                                                                                                                                                                                                                                                                                                                                                                                                                                                                                                                                                                                                                                                                                                                                                                                                                 |                                                                                 | Carboxydotherrnus islandicus                                                                                                                                                                                                                                                                                                                                                                                                                                                                                                                                                                                                                                                                                                                                                                                                                                                                                                                                                                                                                                                                                                                                                                                                                                                                                                                                                                                                                                                    | WP_075864936                  | .....A.....E.....VN.....Q.....K.....I.....A.....                                |               |    |  |
|                                                                                                                                                                                                                                                                                                                                                                                                                                                                                                                                                                                                                                                                                                                                                                                                                                                                                                                                                                                                                                                                                                                                                                                                                                                                                                                                                                                                                                                 |                                                                                 | Desulfurispora thermophila                                                                                                                                                                                                                                                                                                                                                                                                                                                                                                                                                                                                                                                                                                                                                                                                                                                                                                                                                                                                                                                                                                                                                                                                                                                                                                                                                                                                                                                      | WP_018085494                  | .....A.....E.....VN.....Q.....K.....I.....A.....                                |               |    |  |
|                                                                                                                                                                                                                                                                                                                                                                                                                                                                                                                                                                                                                                                                                                                                                                                                                                                                                                                                                                                                                                                                                                                                                                                                                                                                                                                                                                                                                                                 |                                                                                 | Desulfotomaculum austrailicum                                                                                                                                                                                                                                                                                                                                                                                                                                                                                                                                                                                                                                                                                                                                                                                                                                                                                                                                                                                                                                                                                                                                                                                                                                                                                                                                                                                                                                                   | WP_073162480                  | .....A.....E.....VN.....Q.....K.....I.....A.....                                |               |    |  |
|                                                                                                                                                                                                                                                                                                                                                                                                                                                                                                                                                                                                                                                                                                                                                                                                                                                                                                                                                                                                                                                                                                                                                                                                                                                                                                                                                                                                                                                 |                                                                                 | Symbiobacterium thermophilum                                                                                                                                                                                                                                                                                                                                                                                                                                                                                                                                                                                                                                                                                                                                                                                                                                                                                                                                                                                                                                                                                                                                                                                                                                                                                                                                                                                                                                                    | WP_011194377                  | .....A.....E.....VN.....Q.....K.....I.....A.....                                |               |    |  |
|                                                                                                                                                                                                                                                                                                                                                                                                                                                                                                                                                                                                                                                                                                                                                                                                                                                                                                                                                                                                                                                                                                                                                                                                                                                                                                                                                                                                                                                 |                                                                                 | Anaerolinea thermolimosa                                                                                                                                                                                                                                                                                                                                                                                                                                                                                                                                                                                                                                                                                                                                                                                                                                                                                                                                                                                                                                                                                                                                                                                                                                                                                                                                                                                                                                                        | WP_062192971                  | .....Q.....V.....E.....E.....V.....A.....I.....F.....                           |               |    |  |
|                                                                                                                                                                                                                                                                                                                                                                                                                                                                                                                                                                                                                                                                                                                                                                                                                                                                                                                                                                                                                                                                                                                                                                                                                                                                                                                                                                                                                                                 |                                                                                 | Brevibacillus parabrevis                                                                                                                                                                                                                                                                                                                                                                                                                                                                                                                                                                                                                                                                                                                                                                                                                                                                                                                                                                                                                                                                                                                                                                                                                                                                                                                                                                                                                                                        | WP_063230978                  | .....Q.....V.....E.....E.....V.....A.....I.....F.....                           |               |    |  |
|                                                                                                                                                                                                                                                                                                                                                                                                                                                                                                                                                                                                                                                                                                                                                                                                                                                                                                                                                                                                                                                                                                                                                                                                                                                                                                                                                                                                                                                 |                                                                                 | Thermanaeromonas toyohensis                                                                                                                                                                                                                                                                                                                                                                                                                                                                                                                                                                                                                                                                                                                                                                                                                                                                                                                                                                                                                                                                                                                                                                                                                                                                                                                                                                                                                                                     | WP_084663666                  | .....V.....V.....F.....M.....K.....K.....I.....A.....F.....                     |               |    |  |
|                                                                                                                                                                                                                                                                                                                                                                                                                                                                                                                                                                                                                                                                                                                                                                                                                                                                                                                                                                                                                                                                                                                                                                                                                                                                                                                                                                                                                                                 |                                                                                 | Acetobacterium bakii                                                                                                                                                                                                                                                                                                                                                                                                                                                                                                                                                                                                                                                                                                                                                                                                                                                                                                                                                                                                                                                                                                                                                                                                                                                                                                                                                                                                                                                            | WP_050739099                  | .....V.....V.....MT.....I.....D.....A.....LI.....                               |               |    |  |
| <pre> 50          60          70          80          90 TDDTRIRAALPTIRYLLLEQGANVVLMSHLGRPKGKVNKYSMRPFVVERLFE .....H.....P.....DPR..... .....H.....P.....P.....L..... .....E.S.....I.....P..... .....H.S.....P.....P.....L..... .....H.K.I.....P.....P.....L..... .....H.S.....PDP.....L..... .....H.S.....PDP.....L..... .....H.S.....P.....P.....L..... .....H.S.....H.A.I.....N.....VESMRLA.....A.A.A. .....H.S.I.....N.....VESMRLA.....A.A.A. .....N.....S.....K.....AEEFRLK.....ADH.QS A.....E.....G.....P.....PA.TLA.....A.H.RR .....A.....Q.....R.....K.....LIVA.....QF.E.....LK.AK.A. .....A.....Q.....D.....A.....I.....GDPD.....LK.A.Y.GQ .....LQ.....R.....K.....LIVA.....QF.E.....LK.AK.S. .....E.....VN.....Q.....K.....I.....A.....DER.RLDA.AR.E.S. A.....Q.....R.....K.....LIVA.....QF.E.....LK.AK.S. .....V.....V.....E.....V.....A.....I.....F.....QR.E.....LA.CAR.S.S. Q.....V.....E.....E.....V.....A.....I.....F.....GDPD.....K.A.Y.GK .....V.....V.....F.....M.....K.....K.....I.....A.....F.....Q.VEEMRLT.....ASH.SA V.....V.....M.....K.....K.....I.....V.....E.....TLRLN.....AR.SA .....V.....MT.....I.....D.....A.....LI.....NEPDP.....LE.IAKK.S. </pre>                                                                                                                                                                                                                                                               |                                                                                 |                                                                                                                                                                                                                                                                                                                                                                                                                                                                                                                                                                                                                                                                                                                                                                                                                                                                                                                                                                                                                                                                                                                                                                                                                                                                                                                                                                                                                                                                                 |                               |                                                                                 |               |    |  |
| <b>b</b>                                                                                                                                                                                                                                                                                                                                                                                                                                                                                                                                                                                                                                                                                                                                                                                                                                                                                                                                                                                                                                                                                                                                                                                                                                                                                                                                                                                                                                        | Viridilinea + Chloroploca + Chloranaerofilum (3/3)<br>Oscillochloridaceae (0/1) | 'Ca. Viridilinea mediisalina'                                                                                                                                                                                                                                                                                                                                                                                                                                                                                                                                                                                                                                                                                                                                                                                                                                                                                                                                                                                                                                                                                                                                                                                                                                                                                                                                                                                                                                                   | WP_097644959                  | LDQWVQLAGAVLARTAQNASLVTTPP                                                      |               |    |  |
|                                                                                                                                                                                                                                                                                                                                                                                                                                                                                                                                                                                                                                                                                                                                                                                                                                                                                                                                                                                                                                                                                                                                                                                                                                                                                                                                                                                                                                                 |                                                                                 | 'Ca. Chloroploca asiatica'                                                                                                                                                                                                                                                                                                                                                                                                                                                                                                                                                                                                                                                                                                                                                                                                                                                                                                                                                                                                                                                                                                                                                                                                                                                                                                                                                                                                                                                      | WP_097650845                  | .....I.....S.....V.....L.....A.....R.....QV.....DT.....                         |               |    |  |
|                                                                                                                                                                                                                                                                                                                                                                                                                                                                                                                                                                                                                                                                                                                                                                                                                                                                                                                                                                                                                                                                                                                                                                                                                                                                                                                                                                                                                                                 |                                                                                 | 'Ca. Chloranaerofilum corporosum'                                                                                                                                                                                                                                                                                                                                                                                                                                                                                                                                                                                                                                                                                                                                                                                                                                                                                                                                                                                                                                                                                                                                                                                                                                                                                                                                                                                                                                               | peg.1670                      | .....I.X.X.....T.....T.....AEE.....SM.I.....DT.....                             |               |    |  |
|                                                                                                                                                                                                                                                                                                                                                                                                                                                                                                                                                                                                                                                                                                                                                                                                                                                                                                                                                                                                                                                                                                                                                                                                                                                                                                                                                                                                                                                 | Chloroflexaceae (0/6)                                                           | Oscillochloris trichoides                                                                                                                                                                                                                                                                                                                                                                                                                                                                                                                                                                                                                                                                                                                                                                                                                                                                                                                                                                                                                                                                                                                                                                                                                                                                                                                                                                                                                                                       | WP_006560707                  | .....I.....A.....EQ.....KN.....IS.....T.....V.....                              |               |    |  |
|                                                                                                                                                                                                                                                                                                                                                                                                                                                                                                                                                                                                                                                                                                                                                                                                                                                                                                                                                                                                                                                                                                                                                                                                                                                                                                                                                                                                                                                 |                                                                                 | Chloroflexus aurantiacus                                                                                                                                                                                                                                                                                                                                                                                                                                                                                                                                                                                                                                                                                                                                                                                                                                                                                                                                                                                                                                                                                                                                                                                                                                                                                                                                                                                                                                                        | YP_001636577                  | .....C.....H.....VA.A.A.....EQ.....KS.....I.....T.....I.....                    |               |    |  |
|                                                                                                                                                                                                                                                                                                                                                                                                                                                                                                                                                                                                                                                                                                                                                                                                                                                                                                                                                                                                                                                                                                                                                                                                                                                                                                                                                                                                                                                 |                                                                                 | Chloroflexus aggregans                                                                                                                                                                                                                                                                                                                                                                                                                                                                                                                                                                                                                                                                                                                                                                                                                                                                                                                                                                                                                                                                                                                                                                                                                                                                                                                                                                                                                                                          | WP_015941421                  | .....C.....H.....VA.A.A.....EQ.....KS.....I.....T.....I.....                    |               |    |  |
|                                                                                                                                                                                                                                                                                                                                                                                                                                                                                                                                                                                                                                                                                                                                                                                                                                                                                                                                                                                                                                                                                                                                                                                                                                                                                                                                                                                                                                                 |                                                                                 | Chloroflexus islandicus                                                                                                                                                                                                                                                                                                                                                                                                                                                                                                                                                                                                                                                                                                                                                                                                                                                                                                                                                                                                                                                                                                                                                                                                                                                                                                                                                                                                                                                         | WP_066782350                  | .....C.....H.....VA.A.A.....EQ.....KS.....I.....T.....M.....                    |               |    |  |
|                                                                                                                                                                                                                                                                                                                                                                                                                                                                                                                                                                                                                                                                                                                                                                                                                                                                                                                                                                                                                                                                                                                                                                                                                                                                                                                                                                                                                                                 |                                                                                 | Chloroflexus sp. Y-400-fl                                                                                                                                                                                                                                                                                                                                                                                                                                                                                                                                                                                                                                                                                                                                                                                                                                                                                                                                                                                                                                                                                                                                                                                                                                                                                                                                                                                                                                                       | ACM53635                      | .....C.....H.....VA.A.A.....EQ.....KS.....I.....T.....I.....                    |               |    |  |
|                                                                                                                                                                                                                                                                                                                                                                                                                                                                                                                                                                                                                                                                                                                                                                                                                                                                                                                                                                                                                                                                                                                                                                                                                                                                                                                                                                                                                                                 |                                                                                 | Chloroflexus sp. MS-G                                                                                                                                                                                                                                                                                                                                                                                                                                                                                                                                                                                                                                                                                                                                                                                                                                                                                                                                                                                                                                                                                                                                                                                                                                                                                                                                                                                                                                                           | WP_031458033                  | .....C.....H.....VA.A.A.....EQ.....KS.....I.....T.....I.....                    |               |    |  |
|                                                                                                                                                                                                                                                                                                                                                                                                                                                                                                                                                                                                                                                                                                                                                                                                                                                                                                                                                                                                                                                                                                                                                                                                                                                                                                                                                                                                                                                 | Roseiflexaceae (0/2)                                                            | Chloroflexus sp. Y-396-1                                                                                                                                                                                                                                                                                                                                                                                                                                                                                                                                                                                                                                                                                                                                                                                                                                                                                                                                                                                                                                                                                                                                                                                                                                                                                                                                                                                                                                                        | WP_028458415                  | .....C.....H.....VA.A.A.....EQ.....KS.....I.....T.....I.....                    |               |    |  |
|                                                                                                                                                                                                                                                                                                                                                                                                                                                                                                                                                                                                                                                                                                                                                                                                                                                                                                                                                                                                                                                                                                                                                                                                                                                                                                                                                                                                                                                 |                                                                                 | Roseiflexus castenholzii                                                                                                                                                                                                                                                                                                                                                                                                                                                                                                                                                                                                                                                                                                                                                                                                                                                                                                                                                                                                                                                                                                                                                                                                                                                                                                                                                                                                                                                        | WP_012122829                  | .....I.....V.....V.....V.....V.....V.....V.....V.....                           |               |    |  |
|                                                                                                                                                                                                                                                                                                                                                                                                                                                                                                                                                                                                                                                                                                                                                                                                                                                                                                                                                                                                                                                                                                                                                                                                                                                                                                                                                                                                                                                 |                                                                                 | Roseiflexus sp. RS-1                                                                                                                                                                                                                                                                                                                                                                                                                                                                                                                                                                                                                                                                                                                                                                                                                                                                                                                                                                                                                                                                                                                                                                                                                                                                                                                                                                                                                                                            | WP_011958162                  | .....I.....V.....V.....V.....V.....V.....V.....V.....                           |               |    |  |
|                                                                                                                                                                                                                                                                                                                                                                                                                                                                                                                                                                                                                                                                                                                                                                                                                                                                                                                                                                                                                                                                                                                                                                                                                                                                                                                                                                                                                                                 |                                                                                 | Kouleothrix aurantiaca                                                                                                                                                                                                                                                                                                                                                                                                                                                                                                                                                                                                                                                                                                                                                                                                                                                                                                                                                                                                                                                                                                                                                                                                                                                                                                                                                                                                                                                          | KPV53397                      | .....I.....V.....V.....V.....V.....V.....V.....V.....                           |               |    |  |
|                                                                                                                                                                                                                                                                                                                                                                                                                                                                                                                                                                                                                                                                                                                                                                                                                                                                                                                                                                                                                                                                                                                                                                                                                                                                                                                                                                                                                                                 |                                                                                 | Herpetosiphon geysericola                                                                                                                                                                                                                                                                                                                                                                                                                                                                                                                                                                                                                                                                                                                                                                                                                                                                                                                                                                                                                                                                                                                                                                                                                                                                                                                                                                                                                                                       | WP_054532379                  | .....N.....IH.....A.....T.....AV.....AYES.....K.....I.....NDALV.L.....          |               |    |  |
|                                                                                                                                                                                                                                                                                                                                                                                                                                                                                                                                                                                                                                                                                                                                                                                                                                                                                                                                                                                                                                                                                                                                                                                                                                                                                                                                                                                                                                                 | Other Bacteria (0/250)                                                          | Herpetosiphon aurantiacus                                                                                                                                                                                                                                                                                                                                                                                                                                                                                                                                                                                                                                                                                                                                                                                                                                                                                                                                                                                                                                                                                                                                                                                                                                                                                                                                                                                                                                                       | A9AUHO                        | .....N.....IH.....A.....T.....AV.....AYES.....K.....I.....NDALV.L.....          |               |    |  |
|                                                                                                                                                                                                                                                                                                                                                                                                                                                                                                                                                                                                                                                                                                                                                                                                                                                                                                                                                                                                                                                                                                                                                                                                                                                                                                                                                                                                                                                 |                                                                                 | Anaerolinea thermophila                                                                                                                                                                                                                                                                                                                                                                                                                                                                                                                                                                                                                                                                                                                                                                                                                                                                                                                                                                                                                                                                                                                                                                                                                                                                                                                                                                                                                                                         | KUK46703                      | ISN.MH.ASI.NQSKV.....H.....PEQV.....K.....IST.NTQI.S.....                       |               |    |  |
|                                                                                                                                                                                                                                                                                                                                                                                                                                                                                                                                                                                                                                                                                                                                                                                                                                                                                                                                                                                                                                                                                                                                                                                                                                                                                                                                                                                                                                                 |                                                                                 | Ardenticatena maritima                                                                                                                                                                                                                                                                                                                                                                                                                                                                                                                                                                                                                                                                                                                                                                                                                                                                                                                                                                                                                                                                                                                                                                                                                                                                                                                                                                                                                                                          | WP_054492006                  | .....MR.....A.....H.....HT.....V.....V.....Q.....APQA.LK.I.....IN.S.ALV.VI..... |               |    |  |
|                                                                                                                                                                                                                                                                                                                                                                                                                                                                                                                                                                                                                                                                                                                                                                                                                                                                                                                                                                                                                                                                                                                                                                                                                                                                                                                                                                                                                                                 |                                                                                 | Litorilinea aerophila                                                                                                                                                                                                                                                                                                                                                                                                                                                                                                                                                                                                                                                                                                                                                                                                                                                                                                                                                                                                                                                                                                                                                                                                                                                                                                                                                                                                                                                           | QUC07164                      | .....LR.ST.....AVA.A.A.....ASNS.YK.....GTKV.LI.....                             |               |    |  |
|                                                                                                                                                                                                                                                                                                                                                                                                                                                                                                                                                                                                                                                                                                                                                                                                                                                                                                                                                                                                                                                                                                                                                                                                                                                                                                                                                                                                                                                 |                                                                                 | Sphaerobacter thermophilus                                                                                                                                                                                                                                                                                                                                                                                                                                                                                                                                                                                                                                                                                                                                                                                                                                                                                                                                                                                                                                                                                                                                                                                                                                                                                                                                                                                                                                                      | WP_012871200                  | MG.MT.AS.....QS.G.....A.H.....PERV.....K.V.....ISTGQRQV.M.....                  |               |    |  |
|                                                                                                                                                                                                                                                                                                                                                                                                                                                                                                                                                                                                                                                                                                                                                                                                                                                                                                                                                                                                                                                                                                                                                                                                                                                                                                                                                                                                                                                 |                                                                                 | Desulfacinum infernum                                                                                                                                                                                                                                                                                                                                                                                                                                                                                                                                                                                                                                                                                                                                                                                                                                                                                                                                                                                                                                                                                                                                                                                                                                                                                                                                                                                                                                                           | WP_073040329                  | IES.AK.AV.....DMSEQ.LV.....LSAT.....K.I.F.F.LRLRQI.VI.I.....                    |               |    |  |
|                                                                                                                                                                                                                                                                                                                                                                                                                                                                                                                                                                                                                                                                                                                                                                                                                                                                                                                                                                                                                                                                                                                                                                                                                                                                                                                                                                                                                                                 |                                                                                 | Desulfovirgula thermocuniculi                                                                                                                                                                                                                                                                                                                                                                                                                                                                                                                                                                                                                                                                                                                                                                                                                                                                                                                                                                                                                                                                                                                                                                                                                                                                                                                                                                                                                                                   | WP_027717866                  | I.DLLRRTSQ.S.FCEQ.GV.LW.....LSAT.....K.I.F.F.LRLRQI.VI.I.....                   |               |    |  |
|                                                                                                                                                                                                                                                                                                                                                                                                                                                                                                                                                                                                                                                                                                                                                                                                                                                                                                                                                                                                                                                                                                                                                                                                                                                                                                                                                                                                                                                 |                                                                                 | Tindallia magadiensis                                                                                                                                                                                                                                                                                                                                                                                                                                                                                                                                                                                                                                                                                                                                                                                                                                                                                                                                                                                                                                                                                                                                                                                                                                                                                                                                                                                                                                                           | WP_093369521                  | VGEVI.RT.QL.SQLT.Y.AV.L.L.K.AAASC.K.IQ.QMGVAEQ.ML.AI.....                       |               |    |  |
|                                                                                                                                                                                                                                                                                                                                                                                                                                                                                                                                                                                                                                                                                                                                                                                                                                                                                                                                                                                                                                                                                                                                                                                                                                                                                                                                                                                                                                                 |                                                                                 | Lutispora thermophila                                                                                                                                                                                                                                                                                                                                                                                                                                                                                                                                                                                                                                                                                                                                                                                                                                                                                                                                                                                                                                                                                                                                                                                                                                                                                                                                                                                                                                                           | WP_073025240                  | E.LLETSR.S.EPT.YT.I.LA.Q.VKKS.LKIQ.ARLNDE.M.....IFT.....                        |               |    |  |
|                                                                                                                                                                                                                                                                                                                                                                                                                                                                                                                                                                                                                                                                                                                                                                                                                                                                                                                                                                                                                                                                                                                                                                                                                                                                                                                                                                                                                                                 |                                                                                 | Desulfuromonas acetexigens                                                                                                                                                                                                                                                                                                                                                                                                                                                                                                                                                                                                                                                                                                                                                                                                                                                                                                                                                                                                                                                                                                                                                                                                                                                                                                                                                                                                                                                      | WP_092055003                  | I.RLKH.SKL.SAMTKY.IAMA.Q.FKRTCLR.Q.QKVDSHNI.....T.....                          |               |    |  |
|                                                                                                                                                                                                                                                                                                                                                                                                                                                                                                                                                                                                                                                                                                                                                                                                                                                                                                                                                                                                                                                                                                                                                                                                                                                                                                                                                                                                                                                 |                                                                                 | <pre> 110        120        130        140        150 LDQWVQLAGAVLARTAQNASLVTTPPSSDPLRFHLELVAIHESMALAVLV .....I.....S.....V.....L.....A.....R.....QV.....DT..... .....I.X.X.....T.....T.....AEE.....SM.I.....DT..... .....I.....A.....EQ.....KN.....IS.....T.....V..... .....C.....H.....VA.A.A.....EQ.....KS.....I.....T.....I..... .....C.....H.....VA.A.A.....EQ.....KS.....I.....T.....I..... .....C.....H.....VA.A.A.....EQ.....KS.....I.....T.....M..... .....C.....H.....VA.A.A.....EQ.....KS.....I.....T.....I..... .....C.....H.....VA.A.A.....EQ.....KS.....I.....T.....I..... .....I.....V.....V.....V.....V.....V.....V.....V..... .....I.....V.....V.....V.....V.....V.....V.....V..... .....N.....IH.....A.....T.....AV.....AYES.....K.....I.....NDALV.L..... .....N.....IH.....A.....T.....AV.....AYES.....K.....I.....NDALV.L..... ISN.MH.ASI.NQSKV.....H.....PEQV.....K.....IST.NTQI.S..... .....MR.....A.....H.....HT.....V.....V.....Q.....APQA.LK.I.....IN.S.ALV.VI..... .....LR.ST.....AVA.A.A.....ASNS.YK.....GTKV.LI..... MG.MT.AS.....QS.G.....A.H.....PERV.....K.V.....ISTGQRQV.M..... IES.AK.AV.....DMSEQ.LV.....LSAT.....K.I.F.F.LRLRQI.VI.I..... I.DLLRRTSQ.S.FCEQ.GV.LW.....LSAT.....K.I.F.F.LRLRQI.VI.I..... VGEVI.RT.QL.SQLT.Y.AV.L.L.K.AAASC.K.IQ.QMGVAEQ.ML.AI..... E.LLETSR.S.EPT.YT.I.LA.Q.VKKS.LKIQ.ARLNDE.M.....IFT..... I.RLKH.SKL.SAMTKY.IAMA.Q.FKRTCLR.Q.QKVDSHNI.....T..... VEERLRE..K..SAISSYTG.V.MT..FNCTV...I.FLKLQGR.L.VIF. </pre> |                               |                                                                                 |               |    |  |
| <b>c</b>                                                                                                                                                                                                                                                                                                                                                                                                                                                                                                                                                                                                                                                                                                                                                                                                                                                                                                                                                                                                                                                                                                                                                                                                                                                                                                                                                                                                                                        |                                                                                 | Viridilinea + Chloroploca + Chloranaerofilum (3/3)<br>Oscillochloridaceae (0/1)                                                                                                                                                                                                                                                                                                                                                                                                                                                                                                                                                                                                                                                                                                                                                                                                                                                                                                                                                                                                                                                                                                                                                                                                                                                                                                                                                                                                 | 'Ca. Viridilinea mediisalina' | WP_097642428                                                                    | LIKLSGEQIKGTD |    |  |
|                                                                                                                                                                                                                                                                                                                                                                                                                                                                                                                                                                                                                                                                                                                                                                                                                                                                                                                                                                                                                                                                                                                                                                                                                                                                                                                                                                                                                                                 | 'Ca. Chloroploca asiatica'                                                      |                                                                                                                                                                                                                                                                                                                                                                                                                                                                                                                                                                                                                                                                                                                                                                                                                                                                                                                                                                                                                                                                                                                                                                                                                                                                                                                                                                                                                                                                                 | WP_097650829                  | .....L.....L.....Q.....R.....D.....V.....                                       |               |    |  |
|                                                                                                                                                                                                                                                                                                                                                                                                                                                                                                                                                                                                                                                                                                                                                                                                                                                                                                                                                                                                                                                                                                                                                                                                                                                                                                                                                                                                                                                 | 'Ca. Chloranaerofilum corporosum'                                               |                                                                                                                                                                                                                                                                                                                                                                                                                                                                                                                                                                                                                                                                                                                                                                                                                                                                                                                                                                                                                                                                                                                                                                                                                                                                                                                                                                                                                                                                                 | peg.1754                      | .....L.....L.....Q.....R.....D.....V.....                                       |               |    |  |
|                                                                                                                                                                                                                                                                                                                                                                                                                                                                                                                                                                                                                                                                                                                                                                                                                                                                                                                                                                                                                                                                                                                                                                                                                                                                                                                                                                                                                                                 | Chloroflexaceae (0/6)                                                           | Oscillochloris trichoides                                                                                                                                                                                                                                                                                                                                                                                                                                                                                                                                                                                                                                                                                                                                                                                                                                                                                                                                                                                                                                                                                                                                                                                                                                                                                                                                                                                                                                                       | WP_006562130                  | .....D.....S.....T.....F.....Q.....I.....K.....V.....Q.....I.....               |               |    |  |
|                                                                                                                                                                                                                                                                                                                                                                                                                                                                                                                                                                                                                                                                                                                                                                                                                                                                                                                                                                                                                                                                                                                                                                                                                                                                                                                                                                                                                                                 |                                                                                 | Chloroflexus aurantiacus                                                                                                                                                                                                                                                                                                                                                                                                                                                                                                                                                                                                                                                                                                                                                                                                                                                                                                                                                                                                                                                                                                                                                                                                                                                                                                                                                                                                                                                        | AY36751                       | .....N.....C.....I.....F.....Q.....IGR.....I.....V.....V.....                   |               |    |  |
|                                                                                                                                                                                                                                                                                                                                                                                                                                                                                                                                                                                                                                                                                                                                                                                                                                                                                                                                                                                                                                                                                                                                                                                                                                                                                                                                                                                                                                                 |                                                                                 | Chloroflexus aggregans                                                                                                                                                                                                                                                                                                                                                                                                                                                                                                                                                                                                                                                                                                                                                                                                                                                                                                                                                                                                                                                                                                                                                                                                                                                                                                                                                                                                                                                          | WP_012615832                  | .....N.....C.....I.....F.....Q.....IGR.....I.....V.....V.....                   |               |    |  |
|                                                                                                                                                                                                                                                                                                                                                                                                                                                                                                                                                                                                                                                                                                                                                                                                                                                                                                                                                                                                                                                                                                                                                                                                                                                                                                                                                                                                                                                 |                                                                                 | Chloroflexus islandicus                                                                                                                                                                                                                                                                                                                                                                                                                                                                                                                                                                                                                                                                                                                                                                                                                                                                                                                                                                                                                                                                                                                                                                                                                                                                                                                                                                                                                                                         | WP_066790371                  | .....N.....C.....I.....F.....Q.....IGR.....I.....V.....V.....                   |               |    |  |
|                                                                                                                                                                                                                                                                                                                                                                                                                                                                                                                                                                                                                                                                                                                                                                                                                                                                                                                                                                                                                                                                                                                                                                                                                                                                                                                                                                                                                                                 |                                                                                 | Chloroflexus sp. Y-396-1                                                                                                                                                                                                                                                                                                                                                                                                                                                                                                                                                                                                                                                                                                                                                                                                                                                                                                                                                                                                                                                                                                                                                                                                                                                                                                                                                                                                                                                        | WP_028459803                  | .....N.....C.....I.....F.....Q.....IGR.....I.....V.....V.....                   |               |    |  |
|                                                                                                                                                                                                                                                                                                                                                                                                                                                                                                                                                                                                                                                                                                                                                                                                                                                                                                                                                                                                                                                                                                                                                                                                                                                                                                                                                                                                                                                 |                                                                                 | Chloroflexus sp. Y-400-fl                                                                                                                                                                                                                                                                                                                                                                                                                                                                                                                                                                                                                                                                                                                                                                                                                                                                                                                                                                                                                                                                                                                                                                                                                                                                                                                                                                                                                                                       | ACM55214                      | .....N.....C.....I.....F.....Q.....IGR.....I.....V.....V.....                   |               |    |  |
|                                                                                                                                                                                                                                                                                                                                                                                                                                                                                                                                                                                                                                                                                                                                                                                                                                                                                                                                                                                                                                                                                                                                                                                                                                                                                                                                                                                                                                                 | Roseiflexaceae (0/2)                                                            | Chloroflexus sp. MS-G                                                                                                                                                                                                                                                                                                                                                                                                                                                                                                                                                                                                                                                                                                                                                                                                                                                                                                                                                                                                                                                                                                                                                                                                                                                                                                                                                                                                                                                           | WP_031459886                  | .....N.....C.....I.....F.....Q.....IGR.....I.....V.....V.....                   |               |    |  |
|                                                                                                                                                                                                                                                                                                                                                                                                                                                                                                                                                                                                                                                                                                                                                                                                                                                                                                                                                                                                                                                                                                                                                                                                                                                                                                                                                                                                                                                 |                                                                                 | Roseiflexus castenholzii                                                                                                                                                                                                                                                                                                                                                                                                                                                                                                                                                                                                                                                                                                                                                                                                                                                                                                                                                                                                                                                                                                                                                                                                                                                                                                                                                                                                                                                        | WP_012122383                  | .....L.....ALA.GGAHSIDPN.....E.Y.Q.I.R.L.L.Q.V.L.....                           |               |    |  |
|                                                                                                                                                                                                                                                                                                                                                                                                                                                                                                                                                                                                                                                                                                                                                                                                                                                                                                                                                                                                                                                                                                                                                                                                                                                                                                                                                                                                                                                 |                                                                                 | Roseiflexus sp. RS-1                                                                                                                                                                                                                                                                                                                                                                                                                                                                                                                                                                                                                                                                                                                                                                                                                                                                                                                                                                                                                                                                                                                                                                                                                                                                                                                                                                                                                                                            | WP_041333457                  | .....L.....ALA.KGTHSIDPN.....Y.E.I.R.....Q.V.L.....                             |               |    |  |
|                                                                                                                                                                                                                                                                                                                                                                                                                                                                                                                                                                                                                                                                                                                                                                                                                                                                                                                                                                                                                                                                                                                                                                                                                                                                                                                                                                                                                                                 |                                                                                 | Herpetosiphon aurantiacus                                                                                                                                                                                                                                                                                                                                                                                                                                                                                                                                                                                                                                                                                                                                                                                                                                                                                                                                                                                                                                                                                                                                                                                                                                                                                                                                                                                                                                                       | ABX07589                      | .....L.....ALA.DGKTNI.P.V.N.MSA.IKPLLA.....Q.I.L.....                           |               |    |  |
|                                                                                                                                                                                                                                                                                                                                                                                                                                                                                                                                                                                                                                                                                                                                                                                                                                                                                                                                                                                                                                                                                                                                                                                                                                                                                                                                                                                                                                                 |                                                                                 | Herpetosiphon geysericola                                                                                                                                                                                                                                                                                                                                                                                                                                                                                                                                                                                                                                                                                                                                                                                                                                                                                                                                                                                                                                                                                                                                                                                                                                                                                                                                                                                                                                                       | WP_054536501                  | .....L.....ALA.DGKTNI.P.V.N.MSA.IKPLLA.....Q.I.L.....                           |               |    |  |
|                                                                                                                                                                                                                                                                                                                                                                                                                                                                                                                                                                                                                                                                                                                                                                                                                                                                                                                                                                                                                                                                                                                                                                                                                                                                                                                                                                                                                                                 | Other Bacteria (0/250)                                                          | Kouleothrix aurantiaca                                                                                                                                                                                                                                                                                                                                                                                                                                                                                                                                                                                                                                                                                                                                                                                                                                                                                                                                                                                                                                                                                                                                                                                                                                                                                                                                                                                                                                                          | KPV49760                      | .....L.....ALV.EQCDSI.PTV.EFY.Q.IQSILER.AQ.V.L.....                             |               |    |  |
|                                                                                                                                                                                                                                                                                                                                                                                                                                                                                                                                                                                                                                                                                                                                                                                                                                                                                                                                                                                                                                                                                                                                                                                                                                                                                                                                                                                                                                                 |                                                                                 | Haliangium ochraceum                                                                                                                                                                                                                                                                                                                                                                                                                                                                                                                                                                                                                                                                                                                                                                                                                                                                                                                                                                                                                                                                                                                                                                                                                                                                                                                                                                                                                                                            | WP_012831186                  | .....V.....RAVA.....EFGFNV.AI.H.....IL.L.DL.QISIM.....F.....                    |               |    |  |
|                                                                                                                                                                                                                                                                                                                                                                                                                                                                                                                                                                                                                                                                                                                                                                                                                                                                                                                                                                                                                                                                                                                                                                                                                                                                                                                                                                                                                                                 |                                                                                 | Hydrogenobacter thermophilus                                                                                                                                                                                                                                                                                                                                                                                                                                                                                                                                                                                                                                                                                                                                                                                                                                                                                                                                                                                                                                                                                                                                                                                                                                                                                                                                                                                                                                                    | WP_012963334                  | .....L.....AFA.DHDYGI.P.F.E.IS.IKSLYO.QI.I.....F.....                           |               |    |  |
|                                                                                                                                                                                                                                                                                                                                                                                                                                                                                                                                                                                                                                                                                                                                                                                                                                                                                                                                                                                                                                                                                                                                                                                                                                                                                                                                                                                                                                                 |                                                                                 | 'Ca. Magnetobacterium bavaricum'                                                                                                                                                                                                                                                                                                                                                                                                                                                                                                                                                                                                                                                                                                                                                                                                                                                                                                                                                                                                                                                                                                                                                                                                                                                                                                                                                                                                                                                | KU82453                       | .....L.....ALM.NESYGI.P.VV.A.N.IK.YEL.INI.I.....F.....                          |               |    |  |
|                                                                                                                                                                                                                                                                                                                                                                                                                                                                                                                                                                                                                                                                                                                                                                                                                                                                                                                                                                                                                                                                                                                                                                                                                                                                                                                                                                                                                                                 |                                                                                 | Desulfoluna spongiphila                                                                                                                                                                                                                                                                                                                                                                                                                                                                                                                                                                                                                                                                                                                                                                                                                                                                                                                                                                                                                                                                                                                                                                                                                                                                                                                                                                                                                                                         | WP_092207499                  | .....L.....ALM.DQSEGI.P.MK.V.E.E.KSI.EL.....I.V.....F.....                      |               |    |  |
|                                                                                                                                                                                                                                                                                                                                                                                                                                                                                                                                                                                                                                                                                                                                                                                                                                                                                                                                                                                                                                                                                                                                                                                                                                                                                                                                                                                                                                                 |                                                                                 | Syntrophobacter fumaroxidans                                                                                                                                                                                                                                                                                                                                                                                                                                                                                                                                                                                                                                                                                                                                                                                                                                                                                                                                                                                                                                                                                                                                                                                                                                                                                                                                                                                                                                                    | WP_011698637                  | .....L.....ALL.KEAAGIDSSV.QI.E.T.....OM.Q.I.....F.....                          |               |    |  |
|                                                                                                                                                                                                                                                                                                                                                                                                                                                                                                                                                                                                                                                                                                                                                                                                                                                                                                                                                                                                                                                                                                                                                                                                                                                                                                                                                                                                                                                 |                                                                                 | Desulfatitalea tepidiphila                                                                                                                                                                                                                                                                                                                                                                                                                                                                                                                                                                                                                                                                                                                                                                                                                                                                                                                                                                                                                                                                                                                                                                                                                                                                                                                                                                                                                                                      | WP_054031570                  | .....L.....ALM.DQSEGI.P.A.V.E.IKKP.DN.QL.I.V.....F.....                         |               |    |  |
|                                                                                                                                                                                                                                                                                                                                                                                                                                                                                                                                                                                                                                                                                                                                                                                                                                                                                                                                                                                                                                                                                                                                                                                                                                                                                                                                                                                                                                                 |                                                                                 | Desulfococcus oleovorans                                                                                                                                                                                                                                                                                                                                                                                                                                                                                                                                                                                                                                                                                                                                                                                                                                                                                                                                                                                                                                                                                                                                                                                                                                                                                                                                                                                                                                                        | WP_012173905                  | .....L.....ALM.DQTMGI.P.V.Q.V.E.I.SIC.M.QL.V.V.....F.....                       |               |    |  |
|                                                                                                                                                                                                                                                                                                                                                                                                                                                                                                                                                                                                                                                                                                                                                                                                                                                                                                                                                                                                                                                                                                                                                                                                                                                                                                                                                                                                                                                 |                                                                                 | Streptococcus ferus                                                                                                                                                                                                                                                                                                                                                                                                                                                                                                                                                                                                                                                                                                                                                                                                                                                                                                                                                                                                                                                                                                                                                                                                                                                                                                                                                                                                                                                             | WP_018030266                  | .....L.....ALA.ERCVGINLPTVQAI.K.IKE.E.S.I.I.....L.....                          |               |    |  |
|                                                                                                                                                                                                                                                                                                                                                                                                                                                                                                                                                                                                                                                                                                                                                                                                                                                                                                                                                                                                                                                                                                                                                                                                                                                                                                                                                                                                                                                 |                                                                                 | Paenibacillus wulumuqiensis                                                                                                                                                                                                                                                                                                                                                                                                                                                                                                                                                                                                                                                                                                                                                                                                                                                                                                                                                                                                                                                                                                                                                                                                                                                                                                                                                                                                                                                     | WP_046215390                  | VL.V.....SLS.MTCYGIEA.ISSI.DQIKE.VEL.....V.C.....                               |               |    |  |
|                                                                                                                                                                                                                                                                                                                                                                                                                                                                                                                                                                                                                                                                                                                                                                                                                                                                                                                                                                                                                                                                                                                                                                                                                                                                                                                                                                                                                                                 |                                                                                 | Thermacetogenium phaeum                                                                                                                                                                                                                                                                                                                                                                                                                                                                                                                                                                                                                                                                                                                                                                                                                                                                                                                                                                                                                                                                                                                                                                                                                                                                                                                                                                                                                                                         | WP_015050219                  | VL.....ALA.ERCGIDH.I.KAISL..KEIRDR..Q..I.V.....                                 |               |    |  |
| <pre> 20          30          40          50          60 LIKLSGEQIKGTD EVVSYDMLDYLAEREVEAVHRGVEALVVGGGNIWRG .....L.....L.....Q.....R.....D.....V..... .....L.....L.....Q.....R.....D.....V..... .....D.....S.....T.....F.....Q.....I.....K.....V.....Q.....I..... .....N.....C.....I.....F.....Q.....IGR.....I.....V.....V..... .....N.....C.....I.....F.....Q.....IGR.....I.....V.....V..... .....N.....C.....I.....F.....Q.....IGR.....I.....V.....V..... .....N.....C.....I.....F.....Q.....IGR.....I.....V.....V..... .....N.....C.....I.....F.....Q.....IGR.....I.....V.....V..... .....L.....ALA.GGAHSIDPN.....E.Y.Q.I.R.L.L.Q.V.L..... .....L.....ALA.KGTHSIDPN.....Y.E.I.R.....Q.V.L..... .....L.....ALA.DGKTNI.P.V.N.MSA.IKPLLA.....Q.I.L..... .....L.....ALA.DGKTNI.P.V.N.MSA.IKPLLA.....Q.I.L..... .....L.....ALV.EQCDSI.PTV.EFY.Q.IQSILER.AQ.V.L..... .....V.....RAVA.....EFGFNV.AI.H.....IL.L.DL.QISIM.....F..... .....L.....AFA.DHDYGI.P.F.E.IS.IKSLYO.QI.I.....F..... .....L.....ALM.NESYGI.P.VV.A.N.IK.YEL.INI.I.....F..... .....L.....ALM.DQSEGI.P.MK.V.E.E.KSI.EL.....I.V.....F..... .....L.....ALL.KEAAGIDSSV.QI.E.T.....OM.Q.I.....F..... .....L.....ALM.DQSEGI.P.A.V.E.IKKP.DN.QL.I.V.....F..... .....L.....ALM.DQTMGI.P.V.Q.V.E.I.SIC.M.QL.V.V.....F..... .....L.....ALA.ERCVGINLPTVQAI.K.IKE.E.S.I.I.....L..... VL.V.....SLS.MTCYGIEA.ISSI.DQIKE.VEL.....V.C..... VL.....ALA.ERCGIDH.I.KAISL..KEIRDR..Q..I.V..... </pre> |                                                                                 |                                                                                                                                                                                                                                                                                                                                                                                                                                                                                                                                                                                                                                                                                                                                                                                                                                                                                                                                                                                                                                                                                                                                                                                                                                                                                                                                                                                                                                                                                 |                               |                                                                                 |               |    |  |

Figure 2S. CSIs which specific for 'Ca. Chloroploca asiatica' B7-9, 'Ca. Viridilinea mediosalina' Kir15-3F and 'Candidatus Chloranaerofilum corporosum': phosphoglycerate kinase (a), heat-inducible transcription repressor (b), UMP kinase (c).

|          |                                                                     | 300                               | 310          | 320                                          | 330                             | 340                             |  |
|----------|---------------------------------------------------------------------|-----------------------------------|--------------|----------------------------------------------|---------------------------------|---------------------------------|--|
| <b>a</b> | Viridilinea + Oscillochloris + Chloroploca + Chloranaerofilum (4/4) | 'Ca. Viridilinea mediisalina'     | WP_097643592 | RLPRIVCAQAQANPLRYAFCDNWR                     | YEPIQARTTAASAIQIGDVSVRRA        |                                 |  |
|          |                                                                     | 'Ca. Chloroploca asiatica'        | WP_097651852 | .....EH.....ND.....T.P.....I.IN.....         |                                 |                                 |  |
|          |                                                                     | Oscillochloris trichoides         | WP_006561465 | .....ER.....Y.N.N.....A.QS.....I.....        |                                 |                                 |  |
|          |                                                                     | 'Ca. Chloranaerofilum corporosum' | peg.2079     | .....A.....EH.....YRND.....T.G.....A.IN..... |                                 |                                 |  |
|          | Chloroflexaceae (0/6)                                               | Chloroflexus aurantiacus          | YP_001635551 | .....T.A.....SYLTGF                          | E                               | .....K.QP.....IN.....           |  |
|          |                                                                     | Chloroflexus aggregans            | WP_015940590 | .....T.A.....SYLTGF                          | E                               | .....Q.K.QP.....IN.....         |  |
|          |                                                                     | Chloroflexus islandicus           | WP_066787052 | .....T.A.....SYLTGF                          | E                               | .....K.QP.....IN.....           |  |
|          |                                                                     | Chloroflexus sp. Y-396-1          | WP_084568693 | .....T.A.....SYLTGF                          | E                               | .....A.K.QP.....IN.....         |  |
|          |                                                                     | Chloroflexus sp. Y-400-fl         | ACM53501     | .....T.A.....SYLTGF                          | E                               | .....K.QP.....IN.....           |  |
|          |                                                                     | Chloroflexus sp. MS-G             | WP_031460137 | .....T.A.....SYLTGF                          | E                               | .....A.K.QP.....IN.....         |  |
|          | Other Bacteria (0/250)                                              | 'Ca. Scalindua rubra'             | ODS31053     | K.....V.....SK.....QSYLKGFK                  | E                               | .....K.QK.L.....N.FNK.          |  |
|          |                                                                     | Caldilinea aerophila              | WP_014433627 | .....L.A.....DK.....F.S.LNGF                 | E                               | .....KVT.R.DR.L.....YEK.        |  |
|          |                                                                     | Litorilinea aerophila             | OUC06049     | .....M.L.A.....EK.....F.SYQQGFA              | E                               | .....QKAR.....DK.L.T.....YEK.   |  |
|          |                                                                     | Lyngbya confervoides              | WP_039729766 | .....M.L.A.....AQ.....F.E.RQGF               | E                               | .....AKVSKT.GD.L.N.R.....YDK.   |  |
|          |                                                                     | Rhodopirellula baltica            | WP_011122990 | .....M.L.A.....TER.....F.T.YKNGFA            | E                               | .....AKVSVT.QD.L.N.R.....YAK.   |  |
|          |                                                                     | Stigmatella erecta                | WP_093515675 | .....LAV.....R.....V.S.RGGF                  | E                               | .....EL.MK.ER.L.....N.FK.       |  |
|          |                                                                     | Turneriella parva                 | WP_014801279 | S.....AV.....EA.....L.SKNGF                  | E                               | .....DFQ.....T.KE.....R.N.I.KK. |  |
|          |                                                                     | Melittangium boletus              | WP_095981231 | KR.....AV.....ER.....L.S.RGGF                | E                               | .....ELV.M.ER.L.....N.F.        |  |
|          |                                                                     | Myxococcus fulvus                 | WP_046714163 | R.....AV.....R.....A.RGGF                    | E                               | .....ELQ.M.ES.L.....N.F.        |  |
|          |                                                                     | Labiliithrix luteola              | AKV02771     | .....R.....LCV.....A.D.M.....MKG             | E                               | .....EVT.VV.KA.Q.....R.N.AP.    |  |
|          |                                                                     | Minicystis rosea                  | AFR84597     | .....Y.LCV.....ES.....L.WNAGR                | E                               | .....EVT.QK.E.L.....N.AP.       |  |
|          |                                                                     | Sorangium cellulosum              | KYF78523     | .....F.LCV.....AQ.....L.WSEGR                | E                               | .....EVL.MK.GE.L.....N.AP.      |  |
|          |                                                                     | Leptospira wolffii                | WP_016546692 | K.....L.....L.....LSYLN                      | E                               | .....FEFS.VD.KP.L.....N.QK.     |  |
|          |                                                                     | Nitrospina gracilis               | WP_005010096 | K.....L.....ER.....V.S.KRGR                  | E                               | .....SFKS.....K.L.....A.....KK. |  |
|          |                                                                     | 'Ca. Brocadia fulgida'            | KRO21136     | KQ.....AK.....L.SYLGKF                       | E                               | .....EFA.VK.QK.L.N.....YKK.     |  |
| <b>b</b> | Viridilinea + Oscillochloris + Chloroploca + Chloranaerofilum (4/4) | Oscillochloris trichoides         | WP_044201831 | LVSSGAIAGRERLGSQPQQRV                        | RANVPLKQMFAAVGSRLMHLHYEQLEF     |                                 |  |
|          |                                                                     | 'Ca. Viridilinea mediisalina'     | WP_097642574 | .....V.....MSEA.T.N.....R.....D.....         |                                 |                                 |  |
|          |                                                                     | 'Ca. Chloranaerofilum corporosum' | peg.2467     | .....V.....ALS.S.....V.....                  |                                 |                                 |  |
|          |                                                                     | 'Ca. Chloroploca asiatica'        | WP_097653064 | .....V.....NDA.DH.S.....VY.....              |                                 |                                 |  |
|          | Chloroflexaceae (0/6)                                               | Chloroflexus sp. Y-396-1          | WP_028457576 | .....V.....K.....VS.....S                    | TI.M.V.....I.....I.             |                                 |  |
|          |                                                                     | Chloroflexus sp. MS-G             | WP_031459375 | .....V.....K.....VS.....S                    | TI.M.V.....I.....I.             |                                 |  |
|          |                                                                     | Chloroflexus aurantiacus          | YP_001635142 | .....V.....K.....VN.HH.S                     | .....I.....V.....I.....I.       |                                 |  |
|          |                                                                     | Chloroflexus sp. Y-400-fl         | ACM53078     | .....V.....K.....VN.HH.S                     | .....I.....V.....I.....I.       |                                 |  |
|          |                                                                     | Chloroflexus islandicus           | WP_066783802 | .....V.....K.....VA.R.S                      | .....I.....V.....I.....I.       |                                 |  |
|          |                                                                     | Chloroflexus aggregans            | WP_015941010 | .....V.....K.....AD.RR.S                     | .....I.....V.....I.....I.D      |                                 |  |
|          | Roseiflexaceae (0/2)                                                | Roseiflexus sp. RS-1              | WP_011955532 | .....V.....H.FFARR                           | .....D.....I.....L.....I.....I. |                                 |  |
|          |                                                                     | Roseiflexus castenholzii          | WP_012122883 | .....V.....H.FFARR                           | .....D.....I.....L.....I.....I. |                                 |  |
|          |                                                                     | Deinococcus maricopensis          | WP_013557509 | .....VL.W.A.FE.PT.T                          | LAE.LL.....G.....T.AT.AD        |                                 |  |
|          |                                                                     | Herpetosiphon aurantiacus         | ABX05843     | .....VL.W.A.FPKRR                            | E.LTH.AL.....G.....I.G.....     |                                 |  |
|          | Other Bacteria (0/250)                                              | Herpetosiphon geysericola         | WP_054537191 | .....VL.W.A.FPKRR                            | E.LTH.AL.....G.....I.G.....     |                                 |  |
|          |                                                                     | Kouleothrix aurantiaca            | KPV49139     | .....V.....QFP.RRDK                          | L.F.LL.....I.....I.D            |                                 |  |
|          |                                                                     | Shewanella mangrovi               | WP_037443658 | .....CT.....H.LYQPLPT                        | M.N.LL.....Q.ILAWA.S            |                                 |  |
|          |                                                                     | Oceanimonas smirnovii             | WP_019934382 | V.T.A.....H.FFELAGT                          | MAN.LL.....TQ.IQTWQ.S.N         |                                 |  |
|          |                                                                     | Neiella marina                    | WP_087505398 | VCT.....H.FFDLPAT                            | MAN.LL.....TQ.IQSWQ.S.N         |                                 |  |
|          |                                                                     | Ferrimonas kyonanensis            | WP_028112113 | .....T.....H.QPSPNNT                         | MAN.LL.....TQ.IQSWQ.S.N         |                                 |  |
|          |                                                                     | Zobellella denitrificans          | WP_094038317 | V.T.A.....H.FFELAGT                          | MAN.LL.....TQ.IQSWQ.S.N         |                                 |  |
|          |                                                                     | Ferrimonas sediminum              | WP_090361772 | .....T.....H.QPSPNNT                         | MAN.LL.....TQ.IQSWQ.S.N         |                                 |  |
|          |                                                                     | Vibrio ishigakensis               | GAM61916     | .....VCT.....T.HPELPTS                       | MAT.LL.....H.IQVW.S.S           |                                 |  |
|          |                                                                     | Caldilinea aerophila              | WP_044276207 | .....VCT.....V.AY.NFPALPT                    | ITS.LL.....LQ.GVW.R.A           |                                 |  |
|          |                                                                     | Aeromonas enteropelogenes         | WP_061477127 | V.T.....H.HP.LAPT                            | L.N.L.L.I.TQ.IRVWQ.D.N          |                                 |  |

Figure 3S. CSIs which specific for 'Ca. Chloroploca asiatica' B7-9, 'Ca. Viridilinea mediosalina' Kir15-3F, 'Candidatus Chloranaerofilum corporosum' and *O. trichoides* DG-6: threonine synthase (a) and glutamate 5-kinase (b).
